# Supplementary material for: Evolution of the Avian Eggshell Biomineralization Protein Toolkit – New Insights From Multi-Omics
Source: Front Genet. 2021 May 11;12:672433. doi: 10.3389/fgene.2021.672433 (PMC8144736; doi:10.3389/fgene.2021.672433)
Supplement: Supplementary file 8 [file Table_2.XLSX]

## Sheet: Syntenies
Supplementary Table 2: List of Gene IDs used for each synteny presented in the article.
Synteny RARRES1/OCX32
Species	Common name	Group	Gene symbol	Gene ID
Homo sapiens	Human	mammals	Rarres1	5918
Vombatus ursinus	Wombat	mammals	Rarres1	114053120
Ornithorhinchus anatinus	Platypus	mammals	Rarres1	103171347
Pogona vitticeps	Lizard	reptile	RARRES1	110078062
Chrysemys picta	Turtle	reptile	RARRES1	101944968
Crocodylus porosus	Crocodile	reptile	RARRES1	109308383
Gallus gallus	Chicken	bird	RARRES1/OCX32	395209
Nothoprocta perdicaria	Tinamou	bird	RARRES1	112952371
Xenopus tropicalis	Xenope	amphibian	rarres1	100158540
Danio rerio	Zebra fish	fish	ltx	494053
Synteny BPIFB3/OCX36
Species	Common name	Group	Gene symbol	Gene ID
Homo sapiens	Human	mammals	-	-
Monodelphis domestica	Opossum	mammals	-	-
Ornithorhinchus anatinus	Platypus	mammals	Bpifb4-like	103168108
Chrysemys picta bellii	Turtle	reptile	BPIFB4-like	101941237
Alligator mississipiensis	Alligator	reptile	BPIFB4	106737758
Gallus gallus	Chicken	bird	BPIFB3/OCX36	419289
Taeniopygia guttata	Zebra finch	bird	BPIFB4	100230541
Apteryx mantelli mantelli	Kiwi	bird	BPIFB4-like	106490851
Nanorana parkeri	Frog	amphibian	bpifb4-like	108789316
Latimeria chalumnae	Coelacanth	fish	-	-
Synteny MEPE/OC116 & SPP1/OPN
Species	Common name	Group	Gene symbol	Gene ID	Gene symbol	Gene ID
Homo sapiens	Human	mammals	Mepe	56955	Spp1	6696
Monodelphis domestica	Opossum	mammals	Mepe	103106720	Spp1	100016723
Ornithorhinchus anatinus	Platypus	mammals	-	-	Spp1	100085686
Lacerta agilis	Lizard	reptile	MEPE	117053331	SPP1	117053107
Python bivittatus	Snake	reptile	MEPE	112541968	SPP1	103051467
Chrysemys picta	Turtle	reptile	-	-	SPP1	101931292
Alligator mississipiensis	Alligator	reptile	MEPE	102566219	SPP1	102569137
Gallus gallus	Chicken	bird	MEPE/OC116	395256	SPP1	395210
Apteryx mantelli mantelli	Kiwi	bird	LOC106496654	106496654	SPP1	106496659
Xenopus tropicalis	Xenope	amphibian	LOC100488166	100488166	LOC100271753	100271753
Microcaecilia unicolor	Gymnophiona	amphibian	LOC115462518	115462518	spp1	115461093
Danio rerio	Zebra fish	fish	-	-	spp1	432385
Synteny OC17-like/XCAs
Species	Common name	Group	Gene symbol	Gene ID	Gene symbol	Gene ID
Homo sapiens	Human	mammals	-	-	-	-
Monodelphis domestica	Opossum	mammals	-	-	-	-
Ornithorhinchus anatinus	Platypus	mammals	-	-	-	-
Thamnophis elegans	Snake	reptile	-	-	LOC116511136	116511136
Terrapene carolina triunguis	Turtle	reptile	-	-	LOC112125564 & LOC112113112	112125564 & 112113112
Crocodylus porosus	Crocodile	reptile	LOC109315873	109315873	-	-
Numida meleagris	Guinea fowl	bird	LOC110391423	110391423	LOC110391424	110391424
Aythya fuligula	Tufted duck	bird	LOC116486110	116486110	LOC116488188	116488188
Taeniopygia guttata	Zebra finch	bird	-	-	LOC116807755	116807755
Aquila chrysaetos chrysaetos	Golden eagle	bird	LOC115342250	115342250	LOC115341781	115341781
Apteryx mantelli mantelli	Kiwi	bird	LOC106487154	106487154	LOC106487155	106487155
Xenopus tropicalis	Frog	amphibian	-	-	-	-
